# Supplementary material for: Psychometric Properties of a German Version of the Child and Adolescent Mindfulness Measure (CAMM) in a Community Sample
Source: Springer Nature journal article supplement (doi:10.1007/s12671-022-01943-2), 2022-07-07
Supplement: MOESM2 [file 23250520]

**Supplement 2**

|  | 10-17 years (n=201) | 10-19 years (n=248) |
| --- | --- | --- |
| Model fit ten items |  |  |
| χ2 | 95.81* | 129.97* |
| CFI | .87 | .86 |
| RMSEA | .09 | .11 |
| 90% RMSEA | .07 - .12 | .09 - .12 |
| SRMR | .07 | .07 |
| Cronbach’s α/McDonalds ω | .80/.83 | .83/.85 |
| Model fit seven itemsa |  |  |
| χ2 | 14.40, p=.421 | 19.62, p=.143 |
| CFI | >.99 | >.99 |
| RMSEA | .01 | .04 |
| 90% RMSEA | <.01 - .07 | <.01 - .08 |
| SRMR | .03 | .03 |
| Cronbach’s α/McDonalds ω | .81/.84 | .83/.85 |
| Convergent validity |  |  |
| Self compassion (SCS) | r=.59* | r=.63* |
| Internalizing and externalizing symptoms (YSR short form) | r=-.63* | r=-.63* |
| Quality of life (ILK) | r=.59* | r=.61* |

*Psychometric properties of the CAMM in different age groups*

*Note.* *p<.001. aSeven-item version contains items 1, 3, 4, 7, 8, 9, 10. CAMM Child and Adolescent Mindfulness MeasureCFI comparative fit index, RMSEA root mean square error of approximation, SRMR standardized root mean square residual, SCS Self-Compassion Scale, YSR Youth Self-Report, ILK Inventory for Measuring Quality of Life in Children and Adolescents.
